# Supplementary material for: CD96 Correlates With Immune Infiltration and Impacts Patient Prognosis: A Pan-Cancer Analysis
Source: Front Oncol. 2021 Feb 19;11:634617. doi: 10.3389/fonc.2021.634617 (PMC7935557; doi:10.3389/fonc.2021.634617)
Supplement: Supplementary file 5 [file Table_4.xlsx]

## Sheet: LGG
Query	Statistic	P-value	FDR (BH)	Event_SD	Event_TD
CD96	1	1e-197	1e-193	495	495
CD2	0.908434	7.7226e-197	7.75581e-193	495	502
CD3E	0.895528	7.13524e-183	4.77728e-179	495	502
CD3D	0.877873	1.75963e-166	8.83597e-163	495	413
GZMK	0.873252	1.31105e-162	5.26675e-159	495	447
GZMA	0.869626	1.1266e-159	3.77148e-156	495	479
CXCR6	0.86742	6.22348e-158	1.78578e-154	495	473
CXCR3	0.8646	9.45814e-156	2.3747e-152	495	428
SLAMF6	0.861416	2.40271e-153	5.36232e-150	495	503
LCK	0.858819	1.98854e-151	3.99419e-148	495	508
CCL5	0.858555	3.09841e-151	5.6577e-148	495	516
IL2RB	0.850001	3.42552e-145	5.73374e-142	495	515
SIT1	0.846832	4.76564e-143	7.36329e-140	495	441
CCR2	0.843248	1.10834e-140	1.59014e-137	495	471
UBASH3A	0.840747	4.58418e-139	6.13853e-136	495	353
PYHIN1	0.821791	1.16928e-127	1.46788e-124	495	377
KLRB1	0.819175	3.43323e-126	4.05646e-123	495	419
CD40LG	0.817626	2.47374e-125	2.76042e-122	495	364
CD3G	0.816209	1.48279e-124	1.56754e-121	495	354
ICOS	0.815119	5.81608e-124	5.84109e-121	495	337
IL2RG	0.814303	1.6089e-123	1.53888e-120	495	516
SLAMF1	0.813701	3.39623e-123	3.10076e-120	495	357
TRAT1	0.811982	2.82398e-122	2.46619e-119	495	321
EOMES	0.808862	1.25171e-120	1.04758e-117	495	420
PTPN22	0.795485	6.69844e-114	5.38179e-111	495	500
GZMH	0.795424	7.17697e-114	5.54449e-111	495	457
P2RY10	0.791455	5.69559e-112	4.2371e-109	495	297
GBP5	0.789486	4.81615e-111	3.4549e-108	495	516
FASLG	0.78722	5.46784e-110	3.78714e-107	495	331
GPR171	0.784186	1.3486e-108	9.02932e-106	495	461
ITK	0.779082	2.64224e-106	1.712e-103	495	500
SIRPG	0.773966	4.55588e-104	2.85967e-101	495	398
CST7	0.771338	6.09353e-103	3.70893e-100	495	502
PRF1	0.766821	4.85089e-101	2.86573e-98	495	515
NKG7	0.766044	1.01885e-100	5.84703e-98	495	512
CD5	0.759012	7.45433e-98	4.1591e-95	495	506
CD48	0.758401	1.30811e-97	7.10129e-95	495	513
S100A4	0.758286	1.45342e-97	7.68249e-95	495	516
LY9	0.752997	1.75763e-95	9.05226e-93	495	412
CD52	0.748815	7.15986e-94	3.59532e-91	495	515
ZNF683	0.748392	1.0375e-93	5.08276e-91	495	431
ACAP1	0.748103	1.33539e-93	6.38633e-91	495	516
IL7R	0.741759	3.15979e-91	1.47599e-88	495	477
SLAMF7	0.741171	5.20393e-91	2.37559e-88	495	493
SH2D1A	0.740722	7.60554e-91	3.39478e-88	495	488
TNFAIP8	0.740039	1.35371e-90	5.91102e-88	495	516
PTGER2	0.739195	2.75149e-90	1.17588e-87	495	474
CTSW	0.73877	3.92982e-90	1.64446e-87	495	512
AIM1	0.738719	4.09839e-90	1.68001e-87	495	516
FCGR2C	0.73646	2.68924e-89	1.08032e-86	495	513
XCL2	0.733146	4.10406e-88	1.61635e-85	495	273
KLRD1	0.732861	5.17727e-88	1.99982e-85	495	506
SKAP1	0.731542	1.51311e-87	5.73441e-85	495	435
IKZF3	0.73033	4.02853e-87	1.47973e-84	495	365
CCR4	0.730323	4.05183e-87	1.47973e-84	495	284
TBC1D10C	0.729777	6.28469e-87	2.25418e-84	495	516
GPR174	0.729557	7.50318e-87	2.64402e-84	495	248
IL15	0.726234	1.06059e-85	3.67295e-83	495	515
CD247	0.725194	2.41035e-85	8.2058e-83	495	516
CXCL9	0.716495	2.00245e-82	6.70354e-80	495	508
PLBD1	0.715864	3.22753e-82	1.06276e-79	495	516
CASP4	0.713371	2.10472e-81	6.8186e-79	495	516
FAM129A	0.708108	1.03261e-79	3.29222e-77	495	516
CCR5	0.704219	1.73465e-78	5.39445e-76	495	516
HLA-DPA1	0.70421	1.74569e-78	5.39445e-76	495	516
SERPING1	0.702728	5.05401e-78	1.5381e-75	495	516
FCGR2B	0.700591	2.31318e-77	6.91476e-75	495	515
CXCL10	0.700574	2.34095e-77	6.91476e-75	495	512
DPYD	0.697451	2.10918e-76	6.13985e-74	495	516
RAC2	0.696241	4.90674e-76	1.4027e-73	495	516
CLEC12A	0.696226	4.95827e-76	1.4027e-73	495	431
GPR18	0.695955	5.98975e-76	1.67097e-73	495	412
MYO1G	0.695562	7.86915e-76	2.1652e-73	495	516
CASP8	0.694795	1.33854e-75	3.63323e-73	495	516
HLA-DRA	0.694767	1.36459e-75	3.65355e-73	495	516
CCR7	0.694748	1.38241e-75	3.65355e-73	495	507
GPR141	0.694	2.31809e-75	6.0469e-73	495	396
APOBEC3D	0.692848	5.12004e-75	1.31848e-72	495	516
CD6	0.69052	2.51174e-74	6.38617e-72	495	514
LYZ	0.688905	7.50273e-74	1.88375e-71	495	516
PTGER4	0.688737	8.40392e-74	2.08396e-71	495	516
TXK	0.688146	1.25147e-73	3.0655e-71	495	408
CD8A	0.686959	2.779e-73	6.72519e-71	495	515
LSP1	0.686634	3.45348e-73	8.25793e-71	495	516
XCL1	0.6865	3.77635e-73	8.92373e-71	495	318
DENND2D	0.685369	8.0324e-73	1.87603e-70	495	515
ANO9	0.684557	1.37815e-72	3.18179e-70	495	372
CD7	0.681061	1.3798e-71	3.14939e-69	495	515
HLA-DPB1	0.680298	2.27143e-71	5.12629e-69	495	516
KYNU	0.679032	5.17999e-71	1.15606e-68	495	515
LTB	0.678194	8.91275e-71	1.96727e-68	495	516
IFI30	0.67505	6.72618e-70	1.4685e-67	495	516
C1RL	0.673845	1.45013e-69	3.13197e-67	495	516
HLA-DRB1	0.672876	2.68267e-69	5.73235e-67	495	516
APOBEC3G	0.672038	4.55832e-69	9.63773e-67	495	516
PLSCR1	0.671973	4.74927e-69	9.93687e-67	495	516
SP100	0.671868	5.07451e-69	1.05079e-66	495	516
C1S	0.670077	1.56457e-68	3.20672e-66	495	516
CD74	0.669984	1.65839e-68	3.36469e-66	495	516
C1R	0.669108	2.86866e-68	5.76198e-66	495	516
TNFSF14	0.667465	7.97303e-68	1.58561e-65	495	369
FCRL6	0.667277	8.95804e-68	1.76403e-65	495	487
SQRDL	0.667253	9.09218e-68	1.77306e-65	495	516
S100A11	0.666807	1.19832e-67	2.31437e-65	495	516
GFI1	0.666648	1.32197e-67	2.52887e-65	495	511
ANXA1	0.666059	1.90212e-67	3.60433e-65	495	516
ADPRH	0.665772	2.27043e-67	4.26205e-65	495	516
RAB27A	0.665316	3.00556e-67	5.58979e-65	495	516
IDO1	0.663862	7.33246e-67	1.35119e-64	495	300
CFI	0.66338	9.84657e-67	1.79798e-64	495	516
HCP5	0.662641	1.54453e-66	2.7949e-64	495	516
HLA-DOA	0.662578	1.60536e-66	2.87903e-64	495	516
CIITA	0.66156	2.97901e-66	5.29526e-64	495	516
HSPA7	0.661141	3.83962e-66	6.76514e-64	495	515
CARD16	0.660205	6.75732e-66	1.18024e-63	495	516
GRAP2	0.658378	2.02644e-65	3.49269e-63	495	512
CISH	0.658371	2.03448e-65	3.49269e-63	495	516
MYL12A	0.65825	2.1867e-65	3.72221e-63	495	516
SERPINA1	0.656957	4.73331e-65	7.98935e-63	495	516
CCDC109B	0.656567	5.97149e-65	9.99528e-63	495	516
HLA-DQA1	0.654704	1.8011e-64	2.98982e-62	495	516
FAM26F	0.654431	2.11539e-64	3.4625e-62	495	516
GPR65	0.654427	2.12032e-64	3.4625e-62	495	516
TMEM71	0.653842	2.99279e-64	4.80812e-62	495	516
HLA-DMA	0.653831	3.01307e-64	4.80812e-62	495	516
RUNX3	0.653829	3.01614e-64	4.80812e-62	495	516
MX2	0.652338	7.23376e-64	1.14407e-61	495	516
CLIC1	0.651736	1.02877e-63	1.60793e-61	495	516
SH2D2A	0.651729	1.03268e-63	1.60793e-61	495	506
C16orf54	0.651134	1.46176e-63	2.25852e-61	495	516
CSTA	0.650959	1.61794e-63	2.48076e-61	495	484
CYTIP	0.65086	1.71414e-63	2.60834e-61	495	516
PDCD1	0.649736	3.29164e-63	4.97112e-61	495	485
IFNGR2	0.6493	4.23813e-63	6.35276e-61	495	516
CECR1	0.649038	4.93002e-63	7.33515e-61	495	516
CD28	0.648403	7.11401e-63	1.05068e-60	495	486
CTSC	0.648318	7.47242e-63	1.09555e-60	495	516
EPHA1	0.647981	9.07432e-63	1.32077e-60	495	435
EMR2	0.647528	1.17746e-62	1.70148e-60	495	516
TYMP	0.646874	1.71358e-62	2.45849e-60	495	516
FGL2	0.64479	5.63205e-62	8.02307e-60	495	516
GVIN1	0.644759	5.73265e-62	8.10887e-60	495	516
SAMD3	0.643845	9.63058e-62	1.35273e-59	495	481
B2M	0.643423	1.2235e-61	1.70661e-59	495	516
HLA-E	0.642306	2.29824e-61	3.18362e-59	495	516
CTSS	0.642261	2.35778e-61	3.24372e-59	495	516
EPSTI1	0.641236	4.19718e-61	5.73501e-59	495	516
BATF	0.641038	4.68893e-61	6.36364e-59	495	512
APOL1	0.640952	4.92095e-61	6.6337e-59	495	516
ZAP70	0.640684	5.71783e-61	7.65656e-59	495	513
SLAMF8	0.640538	6.20638e-61	8.25571e-59	495	516
HLA-B	0.640456	6.4969e-61	8.58532e-59	495	516
CFB	0.639609	1.04304e-60	1.36931e-58	495	516
ALPK1	0.639281	1.2526e-60	1.63375e-58	495	516
MSR1	0.639168	1.33358e-60	1.72815e-58	495	516
HLA-DQB2	0.638935	1.51831e-60	1.95492e-58	495	481
MSN	0.6385	1.93387e-60	2.47412e-58	495	516
CTSZ	0.637853	2.76984e-60	3.5212e-58	495	516
SERPINB1	0.637827	2.80986e-60	3.54961e-58	495	516
PARP9	0.637774	2.89407e-60	3.63314e-58	495	516
MACC1	0.636245	6.73521e-60	8.4027e-58	495	489
LOC400759	0.635426	1.05681e-59	1.31031e-57	495	507
ABCC3	0.635344	1.10544e-59	1.3622e-57	495	514
FCGR3A	0.634633	1.63243e-59	1.99933e-57	495	516
VNN2	0.632987	4.01191e-59	4.88383e-57	495	515
TIFA	0.632857	4.3053e-59	5.20941e-57	495	516
LY96	0.632636	4.8547e-59	5.83902e-57	495	516
TLR8	0.632116	6.43892e-59	7.69835e-57	495	514
LTBR	0.631297	1.00356e-58	1.19275e-56	495	516
FAM20A	0.630896	1.24697e-58	1.47333e-56	495	515
MYOF	0.630647	1.426e-58	1.67501e-56	495	516
GBP1	0.630479	1.56186e-58	1.82393e-56	495	516
CASP1	0.630199	1.81648e-58	2.10901e-56	495	516
HSH2D	0.629873	2.16504e-58	2.49926e-56	495	507
ANXA2P2	0.629245	3.03363e-58	3.48192e-56	495	516
HLA-DMB	0.628605	4.27751e-58	4.88171e-56	495	516
LYN	0.62837	4.85085e-58	5.50475e-56	495	516
APOBEC3C	0.627336	8.42678e-58	9.509e-56	495	516
PLAU	0.626679	1.1959e-57	1.34195e-55	495	516
EMR1	0.626288	1.47184e-57	1.64241e-55	495	485
HLA-F	0.626244	1.50682e-57	1.67215e-55	495	516
APOBEC3F	0.624618	3.56586e-57	3.93537e-55	495	516
CXCL11	0.62459	3.61797e-57	3.97106e-55	495	495
PARP15	0.624255	4.31706e-57	4.71264e-55	495	497
HLA-DQA2	0.623188	7.57165e-57	8.22077e-55	495	511
OAS2	0.62279	9.33226e-57	1.00778e-54	495	516
GAPT	0.622634	1.01244e-56	1.08748e-54	495	513
TBX21	0.622081	1.35264e-56	1.44516e-54	495	509
ITGAL	0.62166	1.68578e-56	1.79156e-54	495	516
TRIM38	0.621384	1.94739e-56	2.0587e-54	495	516
EMP3	0.620965	2.42235e-56	2.5474e-54	495	516
DOK2	0.620653	2.85046e-56	2.98199e-54	495	516
ATP2A3	0.620082	3.83544e-56	3.99164e-54	495	516
GPR82	0.619777	4.49321e-56	4.65209e-54	495	491
SCML4	0.619053	6.53911e-56	6.73562e-54	495	485
CRTAM	0.618755	7.62655e-56	7.81566e-54	495	472
TES	0.618194	1.01897e-55	1.03894e-53	495	516
PLAUR	0.617725	1.29773e-55	1.31647e-53	495	516
PQLC3	0.61769	1.32125e-55	1.3336e-53	495	516
SP140L	0.617546	1.42295e-55	1.42907e-53	495	516
RHOH	0.617269	1.64135e-55	1.6402e-53	495	516
TNFAIP3	0.615236	4.65095e-55	4.6247e-53	495	516
DOK3	0.614453	6.92962e-55	6.85657e-53	495	516
CHI3L1	0.614249	7.68846e-55	7.57012e-53	495	516
LILRB3	0.613651	1.04173e-54	1.02069e-52	495	514
ST8SIA4	0.613548	1.09799e-54	1.07059e-52	495	516
DAPP1	0.61323	1.29002e-54	1.25175e-52	495	516
PTPN7	0.613084	1.38915e-54	1.34147e-52	495	516
FCGR2A	0.612676	1.70793e-54	1.64141e-52	495	516
KLHDC7B	0.612525	1.84279e-54	1.76259e-52	495	514
ANXA2	0.612506	1.86029e-54	1.77089e-52	495	516
CD80	0.611417	3.22302e-54	3.05366e-52	495	442
ISG20	0.61074	4.52999e-54	4.2718e-52	495	516
SP140	0.610453	5.23306e-54	4.91174e-52	495	516
CAST	0.610262	5.75754e-54	5.37888e-52	495	516
TMEM154	0.609354	9.07209e-54	8.43621e-52	495	516
EMILIN2	0.608806	1.19263e-53	1.10392e-51	495	516
CSF2RB	0.608789	1.20308e-53	1.10849e-51	495	516
ITGB7	0.608687	1.26605e-53	1.16119e-51	495	516
TIMP1	0.608472	1.40875e-53	1.28619e-51	495	516
CFH	0.607985	1.79596e-53	1.63229e-51	495	516
PTPRC	0.606823	3.19731e-53	2.89284e-51	495	516
FSTL1	0.605858	5.1525e-53	4.64095e-51	495	516
LCP2	0.604472	1.01955e-52	9.14223e-51	495	516
AMICA1	0.603658	1.51995e-52	1.35687e-50	495	516
SLA2	0.602914	2.18674e-52	1.94349e-50	495	515
RAB38	0.601972	3.46181e-52	3.06317e-50	495	514
CD79B	0.601867	3.64371e-52	3.20998e-50	495	510
IQGAP1	0.601772	3.81521e-52	3.34639e-50	495	516
GIMAP2	0.601508	4.33807e-52	3.78846e-50	495	516
RNF135	0.600411	7.38729e-52	6.42342e-50	495	516
SCPEP1	0.600388	7.47151e-52	6.46865e-50	495	516

## Sheet: SKCM
Query	Statistic	P-value	FDR (BH)	Event_SD	Event_TD
CD96	1	1e-38	1e-34	103	103
TIGIT	0.90223	1.12347e-38	1.10825e-34	103	103
SLA2	0.901133	1.91962e-38	1.26241e-34	103	103
CD2	0.900144	3.0933e-38	1.5257e-34	103	103
P2RY10	0.895222	3.09924e-37	1.2229e-33	103	95
UBASH3A	0.893207	7.70328e-37	2.21369e-33	103	102
CD247	0.893163	7.85434e-37	2.21369e-33	103	103
SIT1	0.89135	1.75402e-36	4.32564e-33	103	102
SLAMF6	0.891078	1.97629e-36	4.33225e-33	103	102
GZMA	0.887434	9.48363e-36	1.87103e-32	103	103
LCK	0.886793	1.24266e-35	2.22877e-32	103	103
KIAA0748	0.884593	3.1045e-35	5.10406e-32	103	103
CD3G	0.883479	4.90117e-35	7.29563e-32	103	98
TRAT1	0.883344	5.17709e-35	7.29563e-32	103	95
C16orf54	0.88312	5.67197e-35	7.46016e-32	103	103
CD8A	0.88172	9.98192e-35	1.23083e-31	103	103
GPR171	0.881438	1.11763e-34	1.29705e-31	103	101
CD3D	0.87929	2.61839e-34	2.8699e-31	103	103
TBX21	0.875583	1.09636e-33	1.13842e-30	103	103
SIRPG	0.874041	1.96211e-33	1.90772e-30	103	102
CD5	0.87395	2.03062e-33	1.90772e-30	103	103
SH2D1A	0.873688	2.24008e-33	2.00885e-30	103	100
ITGAL	0.87306	2.83111e-33	2.42847e-30	103	103
CRTAM	0.872268	3.79771e-33	3.12187e-30	103	101
IKZF1	0.87184	4.44703e-33	3.50942e-30	103	103
CD27	0.871616	4.82835e-33	3.66379e-30	103	103
CD8B	0.867253	2.33192e-32	1.70395e-29	103	101
GZMK	0.864658	5.79429e-32	4.0827e-29	103	103
GBP5	0.864554	6.00821e-32	4.08745e-29	103	103
TBC1D10C	0.863745	7.94722e-32	5.22636e-29	103	103
CD3E	0.863507	8.6271e-32	5.49045e-29	103	103
SAMD3	0.862618	1.16981e-31	7.21222e-29	103	100
KLRK1	0.861089	1.96596e-31	1.17535e-28	103	103
CXCR3	0.858738	4.3164e-31	2.50465e-28	103	103
FASLG	0.857667	6.14798e-31	3.46553e-28	103	97
JAKMIP1	0.852748	3.00733e-30	1.6481e-27	103	97
LTA	0.851662	4.23586e-30	2.25863e-27	103	103
XCL2	0.850575	5.95399e-30	3.09122e-27	103	94
TRAF3IP3	0.849771	7.64435e-30	3.86706e-27	103	103
CD6	0.847354	1.60643e-29	7.9233e-27	103	103
SNX20	0.84677	1.91847e-29	9.23161e-27	103	103
SP140	0.845824	2.55382e-29	1.19963e-26	103	103
CCR5	0.845638	2.7011e-29	1.2393e-26	103	103
CXCL13	0.843688	4.83842e-29	2.16948e-26	103	102
ARHGAP9	0.842525	6.82313e-29	2.99141e-26	103	103
NKG7	0.841856	8.30407e-29	3.56154e-26	103	103
PRF1	0.839818	1.50293e-28	6.20694e-26	103	103
CXCL9	0.839801	1.51013e-28	6.20694e-26	103	103
ZNF683	0.839204	1.79367e-28	7.22189e-26	103	99
CXCR6	0.838427	2.24226e-28	8.84752e-26	103	103
BTLA	0.837287	3.10298e-28	1.20037e-25	103	100
SASH3	0.836086	4.35924e-28	1.65391e-25	103	103
PDCD1	0.835686	4.87738e-28	1.81558e-25	103	103
ZNF831	0.834562	6.68166e-28	2.44116e-25	103	98
RHOH	0.833128	9.94841e-28	3.56858e-25	103	102
ACAP1	0.831038	1.76491e-27	6.21783e-25	103	103
FCRL3	0.830785	1.89114e-27	6.54568e-25	103	95
TNFRSF9	0.830158	2.24199e-27	7.62625e-25	103	96
IL2RG	0.828035	3.96947e-27	1.32735e-24	103	103
ICOS	0.827642	4.40758e-27	1.44928e-24	103	101
IL21R	0.826833	5.46561e-27	1.76772e-24	103	103
RASAL3	0.825066	8.70866e-27	2.77118e-24	103	103
KLRD1	0.823336	1.36738e-26	4.28206e-24	103	99
CTSW	0.821758	2.0546e-26	6.33362e-24	103	103
SPN	0.821697	2.08724e-26	6.33524e-24	103	103
LY9	0.82149	2.20088e-26	6.57898e-24	103	103
ZBP1	0.821414	2.24441e-26	6.60895e-24	103	103
SPOCK2	0.821109	2.42665e-26	7.04049e-24	103	103
FAM113B	0.820022	3.20121e-26	9.15314e-24	103	103
IL2RB	0.819733	3.44443e-26	9.70788e-24	103	103
TARP	0.819374	3.77262e-26	1.04831e-23	103	96
LAG3	0.818045	5.27289e-26	1.44484e-23	103	103
CD7	0.816863	7.08728e-26	1.91541e-23	103	103
IFNG	0.812708	1.96962e-25	5.25116e-23	103	89
CCL5	0.812098	2.28399e-25	6.00811e-23	103	103
PTPRCAP	0.809868	3.90481e-25	1.01366e-22	103	103
PTPN7	0.809102	4.68658e-25	1.2008e-22	103	103
GZMH	0.80892	4.89364e-25	1.23778e-22	103	103
FAM26F	0.80833	5.62916e-25	1.40579e-22	103	102
BIN2	0.807774	6.41926e-25	1.58307e-22	103	103
CORO1A	0.802978	1.95989e-24	4.77366e-22	103	103
CYTIP	0.800246	3.65109e-24	8.78443e-22	103	103
THEMIS	0.798288	5.66958e-24	1.34765e-21	103	93
XCL1	0.798192	5.79184e-24	1.36032e-21	103	94
VAV1	0.797949	6.11446e-24	1.4192e-21	103	103
IL10RA	0.796887	7.74411e-24	1.77655e-21	103	103
HSH2D	0.794435	1.32895e-23	3.01365e-21	103	103
SLA	0.79284	1.88071e-23	4.21642e-21	103	103
RGL4	0.790005	3.46156e-23	7.67339e-21	103	99
ITK	0.787383	6.03432e-23	1.32279e-20	103	103
LOC100233209	0.786587	7.13353e-23	1.54656e-20	103	101
TAGAP	0.785772	8.45865e-23	1.81392e-20	103	103
GIMAP4	0.784189	1.1753e-22	2.49328e-20	103	103
INPP5D	0.78045	2.52876e-22	5.30743e-20	103	103
CD52	0.777753	4.3538e-22	9.04171e-20	103	103
ARRDC5	0.777676	4.42105e-22	9.08573e-20	103	78
PTPRC	0.776718	5.3524e-22	1.08381e-19	103	103
APBB1IP	0.776689	5.3836e-22	1.08381e-19	103	103
SELPLG	0.776104	6.0469e-22	1.20504e-19	103	103
TIFAB	0.775847	6.36317e-22	1.25539e-19	103	100
TTC24	0.774147	8.89812e-22	1.73813e-19	103	82
CCR7	0.773486	1.01291e-21	1.95919e-19	103	103
PLA2G2D	0.771525	1.48383e-21	2.84219e-19	103	99
PRKCQ	0.771128	1.60244e-21	3.03986e-19	103	102
DTHD1	0.771031	1.63286e-21	3.06807e-19	103	80
KIR2DL4	0.769901	2.03017e-21	3.76668e-19	103	92
C5orf20	0.769869	2.04286e-21	3.76668e-19	103	100
IDO1	0.769093	2.37044e-21	4.31352e-19	103	103
PTPN6	0.769065	2.38316e-21	4.31352e-19	103	103
CARD11	0.768879	2.4694e-21	4.42899e-19	103	103
GPR174	0.768628	2.59094e-21	4.60511e-19	103	86
ARHGAP30	0.767952	2.94735e-21	5.19182e-19	103	103
HCLS1	0.767707	3.08783e-21	5.39113e-19	103	103
GZMB	0.767365	3.29495e-21	5.70228e-19	103	103
WAS	0.766234	4.08116e-21	7.00149e-19	103	103
RAB37	0.765568	4.62734e-21	7.87007e-19	103	103
CD53	0.764607	5.5411e-21	9.34363e-19	103	103
HAVCR2	0.763756	6.49661e-21	1.0862e-18	103	103
CXCR5	0.763161	7.25658e-21	1.20307e-18	103	99
IRF8	0.761988	9.01911e-21	1.48282e-18	103	103
CCL4	0.76058	1.16876e-20	1.90566e-18	103	103
BCL2L14	0.760227	1.24693e-20	2.01645e-18	103	92
TMEM156	0.759969	1.30729e-20	2.09688e-18	103	95
IKZF3	0.758638	1.6665e-20	2.65149e-18	103	93
SLAMF8	0.758434	1.72927e-20	2.72935e-18	103	103
CD48	0.757913	1.90098e-20	2.97655e-18	103	103
GIMAP5	0.757701	1.97515e-20	3.06832e-18	103	103
SLC12A3	0.755781	2.79157e-20	4.30273e-18	103	82
IRF1	0.755216	3.08843e-20	4.72339e-18	103	103
GIMAP7	0.751216	6.27263e-20	9.51944e-18	103	103
CCR2	0.750903	6.62664e-20	9.97992e-18	103	102
FCRL6	0.750613	6.97104e-20	1.04191e-17	103	103
C2orf85	0.750367	7.27731e-20	1.0795e-17	103	76
CXCR2P1	0.749261	8.82511e-20	1.29933e-17	103	101
LTB	0.748761	9.62434e-20	1.40651e-17	103	103
KCNA3	0.748534	1.00109e-19	1.4456e-17	103	98
CD40LG	0.748518	1.00384e-19	1.4456e-17	103	103
NCKAP1L	0.748271	1.04774e-19	1.49788e-17	103	103
FLT3	0.747964	1.10485e-19	1.56817e-17	103	98
LCP1	0.747811	1.13452e-19	1.59878e-17	103	103
APOL3	0.747609	1.17478e-19	1.64378e-17	103	103
LAT2	0.746371	1.45351e-19	2.01945e-17	103	103
FOXP3	0.744167	2.11676e-19	2.9185e-17	103	103
RCSD1	0.74413	2.13018e-19	2.9185e-17	103	103
CD37	0.74353	2.35833e-19	3.20879e-17	103	103
ZC3H12D	0.742142	2.98033e-19	4.02733e-17	103	100
LAX1	0.741992	3.05638e-19	4.102e-17	103	100
IL18RAP	0.740185	4.1355e-19	5.51279e-17	103	100
PLEK	0.739408	4.70651e-19	6.23187e-17	103	103
MIAT	0.737967	5.97397e-19	7.85737e-17	103	103
PTPN22	0.737484	6.46923e-19	8.45241e-17	103	102
CD74	0.73688	7.14462e-19	9.27344e-17	103	103
MYO1F	0.736473	7.6378e-19	9.84877e-17	103	103
ADAMDEC1	0.736192	7.99747e-19	1.02456e-16	103	101
ARHGAP25	0.735366	9.15245e-19	1.16246e-16	103	103
PARP15	0.73534	9.19171e-19	1.16246e-16	103	99
CD69	0.7352	9.40367e-19	1.18169e-16	103	102
IL15RA	0.734988	9.73339e-19	1.21538e-16	103	103
LAPTM5	0.734636	1.03079e-18	1.27902e-16	103	103
SEPT1	0.734456	1.06124e-18	1.30858e-16	103	103
PSTPIP1	0.734068	1.1303e-18	1.38507e-16	103	101
ZBTB32	0.733315	1.27664e-18	1.55475e-16	103	99
DOK2	0.733194	1.30203e-18	1.57594e-16	103	103
HCST	0.73299	1.34556e-18	1.61869e-16	103	103
TNFAIP8L2	0.730947	1.86787e-18	2.23341e-16	103	103
IPCEF1	0.730847	1.89793e-18	2.25568e-16	103	103
EVI2B	0.73073	1.93374e-18	2.28448e-16	103	103
AMICA1	0.730662	1.95485e-18	2.29567e-16	103	103
S1PR4	0.730425	2.0303e-18	2.37016e-16	103	103
NAPSB	0.729771	2.25293e-18	2.60575e-16	103	103
ITGB2	0.729756	2.25852e-18	2.60575e-16	103	103
LRMP	0.728617	2.70558e-18	3.1034e-16	103	103
PVRIG	0.728157	2.90985e-18	3.3184e-16	103	103
GBP1	0.727607	3.17298e-18	3.57731e-16	103	103
WDFY4	0.727607	3.17314e-18	3.57731e-16	103	103
AKNA	0.726239	3.93356e-18	4.40939e-16	103	103
LOC606724	0.723936	5.63064e-18	6.27609e-16	103	103
PARVG	0.723278	6.23402e-18	6.9096e-16	103	103
HLA-DMB	0.723142	6.36711e-18	7.0177e-16	103	103
LYZ	0.722231	7.32603e-18	8.02974e-16	103	103
HLA-DPB1	0.721993	7.59903e-18	8.28294e-16	103	103
ZNF80	0.721852	7.76585e-18	8.41827e-16	103	78
HLA-DRA	0.721762	7.87405e-18	8.45511e-16	103	103
TLR10	0.721752	7.88555e-18	8.45511e-16	103	98
NLRC3	0.721206	8.57494e-18	9.1446e-16	103	103
PYHIN1	0.720816	9.10191e-18	9.65438e-16	103	103
GBP4	0.72007	1.01994e-17	1.07607e-15	103	103
GPR132	0.719621	1.09209e-17	1.14606e-15	103	103
TLR8	0.718056	1.3844e-17	1.44512e-15	103	101
KLRC1	0.71689	1.65029e-17	1.71361e-15	103	85
KLRB1	0.71545	2.04795e-17	2.1154e-15	103	100
CST7	0.715198	2.12639e-17	2.18498e-15	103	103
SLAMF1	0.713837	2.60375e-17	2.66162e-15	103	100
PSMB9	0.713697	2.65821e-17	2.69414e-15	103	103
GNLY	0.713685	2.66287e-17	2.69414e-15	103	103
GNGT2	0.713046	2.92708e-17	2.94634e-15	103	103
GIMAP1	0.71279	3.04014e-17	3.04462e-15	103	103
CCDC88B	0.711961	3.43551e-17	3.42319e-15	103	103
IL32	0.711423	3.71809e-17	3.68614e-15	103	103
TNFRSF1B	0.709797	4.71723e-17	4.65331e-15	103	103
ZAP70	0.709307	5.0657e-17	4.97219e-15	103	103
HLA-DOB	0.709198	5.14671e-17	5.02671e-15	103	102
PDCD1LG2	0.708523	5.67681e-17	5.51713e-15	103	103
GIMAP6	0.708412	5.76966e-17	5.56578e-15	103	103
AOAH	0.708395	5.78329e-17	5.56578e-15	103	103
CXCL10	0.70808	6.05381e-17	5.79784e-15	103	103
SELL	0.707505	6.57852e-17	6.26993e-15	103	103
GAB3	0.707453	6.62837e-17	6.28707e-15	103	103
CYTH4	0.707187	6.88719e-17	6.50131e-15	103	103
GPR65	0.706082	8.07427e-17	7.58559e-15	103	103
GPR18	0.705494	8.78533e-17	8.21449e-15	103	101
NCR3	0.704533	1.00779e-16	9.37864e-15	103	98
KLHDC7B	0.703728	1.13023e-16	1.04687e-14	103	103
CLEC4E	0.70305	1.24444e-16	1.14727e-14	103	102
CD86	0.701676	1.5114e-16	1.38691e-14	103	103
CIITA	0.700872	1.69247e-16	1.54586e-14	103	103
CXCL11	0.698636	2.31364e-16	2.1035e-14	103	102
FCGR1B	0.698413	2.3868e-16	2.16005e-14	103	103
SUSD3	0.695527	3.5571e-16	3.20448e-14	103	103
RUFY4	0.69538	3.62982e-16	3.25513e-14	103	91
NFAM1	0.695282	3.67905e-16	3.28435e-14	103	103
APOL6	0.695184	3.72893e-16	3.31387e-14	103	103
APOL1	0.694964	3.84279e-16	3.39975e-14	103	103
CCRL2	0.694525	4.08114e-16	3.5945e-14	103	103
HLA-DPA1	0.693338	4.79983e-16	4.2087e-14	103	103
TMPRSS3	0.692412	5.44367e-16	4.75213e-14	103	97
IL12RB1	0.691726	5.97441e-16	5.17859e-14	103	103
LILRB1	0.691713	5.98469e-16	5.17859e-14	103	103
RAC2	0.69118	6.43153e-16	5.54094e-14	103	103
CD84	0.691025	6.56781e-16	5.63376e-14	103	103
CCR4	0.690735	6.8297e-16	5.83304e-14	103	95
TOX2	0.690676	6.88466e-16	5.85463e-14	103	103
NLRC5	0.6905	7.04938e-16	5.96711e-14	103	103
TMEM155	0.690471	7.07742e-16	5.96711e-14	103	86
PTGDR	0.689308	8.27353e-16	6.94589e-14	103	94
SIGLEC10	0.688983	8.6421e-16	7.22458e-14	103	103
C17orf66	0.68794	9.93458e-16	8.27001e-14	103	42
TOX	0.687539	1.04793e-15	8.6703e-14	103	103
C8orf80	0.687522	1.05033e-15	8.6703e-14	103	88
NCF1C	0.686676	1.17517e-15	9.66039e-14	103	102
LSP1	0.686627	1.18298e-15	9.68421e-14	103	103
TNFRSF13B	0.68652	1.19973e-15	9.78076e-14	103	71
MAP4K1	0.686056	1.27578e-15	1.03579e-13	103	103
SPNS3	0.685466	1.37923e-15	1.1152e-13	103	100
CECR1	0.685115	1.44464e-15	1.16332e-13	103	103
LOC400759	0.684455	1.57585e-15	1.26382e-13	103	96
CD244	0.68355	1.77453e-15	1.4174e-13	103	102
FCGR1A	0.682235	2.10719e-15	1.67632e-13	103	103
CEACAM21	0.681689	2.26243e-15	1.79259e-13	103	101
P2RY13	0.68162	2.28281e-15	1.80151e-13	103	102
NCF1	0.67987	2.86363e-15	2.25086e-13	103	103
CD4	0.679833	2.87742e-15	2.25272e-13	103	103
INSL3	0.67976	2.90436e-15	2.26482e-13	103	84
CD72	0.67933	3.07011e-15	2.38466e-13	103	103
ADORA2A	0.678755	3.30606e-15	2.55785e-13	103	103
MS4A1	0.678251	3.52703e-15	2.71815e-13	103	90
GPR114	0.677469	3.89862e-15	2.99284e-13	103	103
TMC8	0.677289	3.98925e-15	3.05054e-13	103	103
VNN2	0.67711	4.08166e-15	3.10915e-13	103	103
ETV7	0.676786	4.25356e-15	3.22763e-13	103	103
TNFSF8	0.675528	4.99187e-15	3.77336e-13	103	102
RARRES3	0.675399	5.07422e-15	3.82096e-13	103	103
LILRB2	0.675226	5.18695e-15	3.891e-13	103	103
HLA-DMA	0.674353	5.7933e-15	4.32939e-13	103	103
CD38	0.674188	5.91513e-15	4.40376e-13	103	100
GIMAP8	0.673942	6.10152e-15	4.52544e-13	103	103
FAM179A	0.671317	8.48216e-15	6.26758e-13	103	101
HLA-DQA2	0.670219	9.72609e-15	7.13358e-13	103	103
C1orf162	0.670218	9.72646e-15	7.13358e-13	103	103
AKAP5	0.669893	1.0127e-14	7.39981e-13	103	102
RASSF5	0.66819	1.25035e-14	9.07205e-13	103	103
CTSS	0.668168	1.25384e-14	9.07205e-13	103	103
TNFRSF8	0.668158	1.25534e-14	9.07205e-13	103	102
NCF1B	0.6681	1.26433e-14	9.10364e-13	103	103
TMSL3	0.667868	1.30096e-14	9.30158e-13	103	103
SNAI3	0.667866	1.30125e-14	9.30158e-13	103	103
SPIB	0.667534	1.35564e-14	9.6554e-13	103	102
PRDM8	0.66721	1.4107e-14	1.00114e-12	103	102
LGALS2	0.667069	1.43533e-14	1.01497e-12	103	101
SECTM1	0.666776	1.48793e-14	1.04841e-12	103	103
MYO1G	0.666637	1.51357e-14	1.06268e-12	103	103
AIF1	0.666352	1.56727e-14	1.09648e-12	103	103
EPSTI1	0.66566	1.70577e-14	1.18915e-12	103	103
APOL4	0.665259	1.79137e-14	1.24444e-12	103	103
KIAA1324	0.664817	1.89047e-14	1.30867e-12	103	103
MS4A6A	0.663864	2.12265e-14	1.46426e-12	103	103
GBP2	0.662846	2.40112e-14	1.65058e-12	103	103
FGD3	0.662777	2.42129e-14	1.65867e-12	103	103
KIR3DL1	0.662131	2.61752e-14	1.78643e-12	103	65
FGD2	0.662105	2.6259e-14	1.78643e-12	103	103
STAT1	0.661773	2.73301e-14	1.8529e-12	103	103
GCH1	0.661678	2.7642e-14	1.86763e-12	103	103
PIK3R5	0.661506	2.82227e-14	1.89449e-12	103	103
CSF3R	0.661503	2.82316e-14	1.89449e-12	103	103
LILRB4	0.661309	2.88975e-14	1.9326e-12	103	103
TMIGD2	0.660985	3.00445e-14	2.00253e-12	103	87
FUT7	0.660898	3.03576e-14	2.01658e-12	103	99
POU2AF1	0.660641	3.13083e-14	2.07275e-12	103	100
HLA-DRB6	0.660388	3.22746e-14	2.12958e-12	103	103
MEI1	0.660263	3.27609e-14	2.15447e-12	103	103
FAM159A	0.659539	3.57205e-14	2.34129e-12	103	94
C1QB	0.658877	3.86548e-14	2.52523e-12	103	103
FCGR1C	0.658783	3.90893e-14	2.54519e-12	103	103
LOC400696	0.657731	4.42919e-14	2.87446e-12	103	76
PLAC8	0.657219	4.70601e-14	3.03599e-12	103	97
ARL11	0.657214	4.70887e-14	3.03599e-12	103	103
IL18BP	0.657165	4.73627e-14	3.04371e-12	103	103
CCDC69	0.65705	4.80113e-14	3.07537e-12	103	103
UBD	0.65694	4.86385e-14	3.10547e-12	103	103
RLTPR	0.654556	6.43873e-14	4.09773e-12	103	103
P2RY8	0.653412	7.35994e-14	4.66895e-12	103	103
ABI3	0.653126	7.6089e-14	4.81141e-12	103	103
CD80	0.652894	7.81788e-14	4.92776e-12	103	99
C1QA	0.652539	8.14701e-14	5.11887e-12	103	103
STAP1	0.651506	9.18447e-14	5.75239e-12	103	88
LAIR1	0.651359	9.34244e-14	5.83282e-12	103	103
BANK1	0.64974	1.12607e-13	7.00827e-12	103	94
SLAMF7	0.649508	1.15658e-13	7.17552e-12	103	103
IFI30	0.648731	1.26442e-13	7.82e-12	103	103
C1orf200	0.647941	1.38399e-13	8.53271e-12	103	69
TCL1A	0.647449	1.46411e-13	8.99855e-12	103	89
SIGLEC1	0.647285	1.49168e-13	9.13957e-12	103	103
GCET2	0.647233	1.50057e-13	9.16556e-12	103	103
GPBAR1	0.647201	1.50594e-13	9.16994e-12	103	103
ZBED2	0.647157	1.51366e-13	9.1886e-12	103	100
IGJ	0.646894	1.55953e-13	9.43805e-12	103	103
CCL4L2	0.646211	1.68548e-13	1.01691e-11	103	102
CSF2RB	0.645517	1.82353e-13	1.09684e-11	103	103
TMEM150B	0.645089	1.91413e-13	1.14784e-11	103	101
SSTR3	0.644744	1.99012e-13	1.18979e-11	103	40
MPEG1	0.644681	2.00432e-13	1.19466e-11	103	103
TNIP3	0.644489	2.04829e-13	1.21719e-11	103	87
SOCS1	0.644253	2.10351e-13	1.24625e-11	103	103
TAP1	0.6441	2.14014e-13	1.26415e-11	103	103
HLA-B	0.643442	2.30444e-13	1.35714e-11	103	103
RASGRP2	0.643296	2.34261e-13	1.37552e-11	103	103
HLA-DOA	0.643103	2.39388e-13	1.40145e-11	103	103
LILRA4	0.641823	2.7629e-13	1.6127e-11	103	95
C9orf139	0.641211	2.95827e-13	1.72164e-11	103	88
ALOX5	0.640913	3.05797e-13	1.77443e-11	103	103
GVIN1	0.640601	3.16611e-13	1.83179e-11	103	101
TLR7	0.640408	3.23488e-13	1.86611e-11	103	103
CLECL1	0.638675	3.91967e-13	2.25455e-11	103	92
CNR2	0.638077	4.18692e-13	2.40127e-11	103	64
CYBB	0.637547	4.43831e-13	2.53807e-11	103	103
GPR120	0.637489	4.46668e-13	2.54691e-11	103	80
FGR	0.637275	4.57328e-13	2.60018e-11	103	103
C1QC	0.636976	4.72574e-13	2.67914e-11	103	103
CD200R1	0.636606	4.92153e-13	2.78215e-11	103	98
KIAA0125	0.635624	5.48013e-13	3.08452e-11	103	85
STAT4	0.635611	5.4877e-13	3.08452e-11	103	103
IL15	0.635333	5.65684e-13	3.17056e-11	103	103
CD79A	0.634885	5.93984e-13	3.31975e-11	103	103
HLA-DRB1	0.632979	7.3053e-13	4.07136e-11	103	103
HLA-DQA1	0.630734	9.30372e-13	5.17051e-11	103	103
C5orf56	0.630383	9.66097e-13	5.35397e-11	103	103
IL7R	0.630082	9.97726e-13	5.51376e-11	103	99
GMFG	0.62999	1.00765e-12	5.55306e-11	103	103
EBI3	0.629091	1.10923e-12	6.09584e-11	103	103
AGAP2	0.627397	1.32818e-12	7.27877e-11	103	103
NEURL3	0.627324	1.33848e-12	7.3149e-11	103	99
PNOC	0.627025	1.38158e-12	7.52961e-11	103	80
TNFAIP8	0.626869	1.4045e-12	7.63342e-11	103	103
NAT8B	0.625117	1.68975e-12	9.15856e-11	103	74
KIR3DL2	0.625026	1.706e-12	9.2213e-11	103	62
SLC7A7	0.624558	1.7918e-12	9.65857e-11	103	103
NCF4	0.623865	1.92697e-12	1.03589e-10	103	103
SPI1	0.623615	1.97794e-12	1.0604e-10	103	103
DENND1C	0.623377	2.02776e-12	1.08416e-10	103	103
FCGR3A	0.62324	2.05696e-12	1.0968e-10	103	103
DPEP2	0.622861	2.14007e-12	1.13805e-10	103	103
GHRL	0.622724	2.17084e-12	1.1513e-10	103	90
MGC29506	0.62169	2.41752e-12	1.27869e-10	103	102
FLT3LG	0.621024	2.5905e-12	1.36652e-10	103	103
TIMD4	0.620998	2.59745e-12	1.36654e-10	103	78
PLD4	0.620583	2.71153e-12	1.42276e-10	103	103
SYTL3	0.619819	2.93423e-12	1.53553e-10	103	103
FPR3	0.618991	3.19542e-12	1.66779e-10	103	103
FAM105A	0.61873	3.28246e-12	1.7087e-10	103	103
IL27	0.618476	3.36927e-12	1.74927e-10	103	87
RNASE6	0.618239	3.45225e-12	1.78765e-10	103	103
SLFN12L	0.618023	3.52948e-12	1.82285e-10	103	96
UBE2L6	0.617149	3.86019e-12	1.98528e-10	103	103
LOC100240735	0.617139	3.8641e-12	1.98528e-10	103	86
DOCK2	0.616632	4.06933e-12	2.08529e-10	103	103
XCR1	0.61598	4.34909e-12	2.22288e-10	103	72
ITGAD	0.61584	4.41149e-12	2.24895e-10	103	96
LY86	0.615528	4.55358e-12	2.3154e-10	103	103
TFEC	0.615414	4.60633e-12	2.3362e-10	103	102
HLA-F	0.614982	4.81296e-12	2.43474e-10	103	103
CXorf21	0.61355	5.56343e-12	2.80718e-10	103	100
SIGLEC8	0.61255	6.15335e-12	3.09692e-10	103	100
TYROBP	0.612433	6.22584e-12	3.12543e-10	103	103
BLK	0.611928	6.54979e-12	3.27972e-10	103	92
TRIM21	0.611842	6.60685e-12	3.29991e-10	103	103
TRIM22	0.611248	7.01201e-12	3.49343e-10	103	103
HLA-DQB1	0.610281	7.72375e-12	3.83833e-10	103	103
ASCL2	0.609698	8.18593e-12	4.0578e-10	103	103
APOB48R	0.609575	8.28685e-12	4.09753e-10	103	103
FAM129C	0.609434	8.40411e-12	4.14512e-10	103	95
PTK2B	0.608935	8.83142e-12	4.34501e-10	103	103
FCRL1	0.608748	8.99695e-12	4.41544e-10	103	57
SLC8A1	0.607644	1.00364e-11	4.91337e-10	103	103
LAIR2	0.607498	1.01824e-11	4.9725e-10	103	83
MIR155HG	0.607282	1.04016e-11	5.06698e-10	103	100
CCR3	0.607159	1.05285e-11	5.11617e-10	103	60
CD300LF	0.606933	1.07663e-11	5.21889e-10	103	103
CTLA4	0.605618	1.22527e-11	5.92485e-10	103	103
PATL2	0.604287	1.39594e-11	6.73362e-10	103	101
STAC3	0.603625	1.48902e-11	7.16511e-10	103	103
C11orf21	0.603519	1.50459e-11	7.2224e-10	103	100
PARP14	0.603306	1.53603e-11	7.35544e-10	103	103
PTGER4	0.603205	1.55132e-11	7.41064e-10	103	103
FMNL1	0.602618	1.64237e-11	7.82663e-10	103	103
TNFRSF17	0.602049	1.73567e-11	8.25132e-10	103	77
BCL11B	0.601198	1.88477e-11	8.93862e-10	103	103
GPA33	0.60115	1.89357e-11	8.95883e-10	103	79
MNDA	0.601002	1.92081e-11	9.06593e-10	103	103
CCR8	0.600807	1.9573e-11	9.21615e-10	103	89
LOC100129066	0.600708	1.97611e-11	9.28252e-10	103	71
PIK3CG	0.600126	2.09016e-11	9.79495e-10	103	103

## Sheet: ACC
Query	Statistic	P-value	FDR (BH)	Event_SD	Event_TD
CD96	1	1e-12	1e-08	78	78
PTPRC	0.694779	1.22527e-12	1.18484e-08	78	79
SLAMF6	0.685094	3.31529e-12	2.13726e-08	78	77
LOC100233209	0.677771	6.86273e-12	2.70888e-08	78	68
IPCEF1	0.677564	7.0033e-12	2.70888e-08	78	79
CD69	0.671149	1.30177e-11	4.19604e-08	78	78
P2RY13	0.663638	2.63909e-11	7.29143e-08	78	78
IKZF1	0.658225	4.33763e-11	9.57328e-08	78	79
RAP2B	0.657436	4.65981e-11	9.57328e-08	78	79
GPR65	0.656768	4.94999e-11	9.57328e-08	78	78
RCSD1	0.655399	5.60011e-11	9.84601e-08	78	79
ARHGAP30	0.654128	6.27633e-11	1.01154e-07	78	79
KLRD1	0.650779	8.45382e-11	1.23204e-07	78	75
IRF8	0.650172	8.91862e-11	1.23204e-07	78	79
MARCH1	0.648406	1.04164e-10	1.34302e-07	78	79
ZNF831	0.64153	1.88818e-10	2.28234e-07	78	63
IL16	0.637758	2.6002e-10	2.95811e-07	78	79
EVI2B	0.635487	3.14594e-10	3.38014e-07	78	79
PIP4K2A	0.632791	3.93671e-10	3.70291e-07	78	79
FYB	0.632675	3.97465e-10	3.70291e-07	78	79
SPN	0.632536	4.02074e-10	3.70291e-07	78	79
SASH3	0.630603	4.71477e-10	4.08204e-07	78	79
LCP2	0.630247	4.85454e-10	4.08204e-07	78	79
CXCR6	0.629594	5.12115e-10	4.12679e-07	78	72
CCR7	0.627895	5.88255e-10	4.36608e-07	78	69
THEMIS	0.627474	6.08688e-10	4.36608e-07	78	61
FGL2	0.626899	6.3776e-10	4.36608e-07	78	79
GRAP2	0.626878	6.38879e-10	4.36608e-07	78	64
NCKAP1L	0.626576	6.54687e-10	4.36608e-07	78	79
IL10RA	0.625327	7.2417e-10	4.50276e-07	78	79
CELF2	0.625154	7.34306e-10	4.50276e-07	78	79
SLAMF1	0.62488	7.50708e-10	4.50276e-07	78	61
PYHIN1	0.623972	8.07462e-10	4.50276e-07	78	62
TFEC	0.623929	8.10245e-10	4.50276e-07	78	79
TNFSF8	0.623858	8.14874e-10	4.50276e-07	78	72
CDK14	0.622611	9.00371e-10	4.83699e-07	78	79
LPXN	0.621771	9.62678e-10	4.94786e-07	78	79
MS4A7	0.621648	9.72175e-10	4.94786e-07	78	79
ITK	0.620151	1.09468e-09	5.26267e-07	78	75
AOAH	0.619919	1.11496e-09	5.26267e-07	78	79
SLCO2B1	0.619911	1.11566e-09	5.26267e-07	78	79
CSF1	0.619441	1.15786e-09	5.33167e-07	78	79
RGS18	0.618775	1.22028e-09	5.48843e-07	78	78
CXCR3	0.618312	1.26551e-09	5.56251e-07	78	74
GZMK	0.617968	1.30018e-09	5.58791e-07	78	69
GPR34	0.615838	1.53591e-09	6.40133e-07	78	79
ENOX2	0.615674	1.55565e-09	6.40133e-07	78	79
DPYD	0.614047	1.76506e-09	6.58166e-07	78	79
C8orf80	0.613712	1.81152e-09	6.58166e-07	78	47
TLR7	0.613711	1.8116e-09	6.58166e-07	78	79
TRAF3IP3	0.613616	1.82496e-09	6.58166e-07	78	79
BTK	0.613515	1.8392e-09	6.58166e-07	78	79
TLR8	0.613486	1.84341e-09	6.58166e-07	78	72
IGSF6	0.613388	1.85745e-09	6.58166e-07	78	79
PLEK	0.613078	1.9024e-09	6.58166e-07	78	79
VAV1	0.613055	1.90575e-09	6.58166e-07	78	79
APBB1IP	0.612722	1.95531e-09	6.63435e-07	78	79
TIGIT	0.612044	2.06012e-09	6.7724e-07	78	65
CYBB	0.612007	2.06604e-09	6.7724e-07	78	79
DSC2	0.611177	2.20194e-09	7.08108e-07	78	78
FGD2	0.610991	2.23343e-09	7.08108e-07	78	79
CD247	0.609893	2.42904e-09	7.49748e-07	78	79
CLEC7A	0.609822	2.4423e-09	7.49748e-07	78	79
CD2	0.608478	2.70542e-09	8.17545e-07	78	78
LAIR1	0.60668	3.09989e-09	9.08047e-07	78	79
PIK3AP1	0.606578	3.12388e-09	9.08047e-07	78	79
SH2D1A	0.606485	3.14577e-09	9.08047e-07	78	73
CD3E	0.605875	3.29376e-09	9.26412e-07	78	78
GBP5	0.605796	3.31338e-09	9.26412e-07	78	79
PARVG	0.605623	3.35666e-09	9.26412e-07	78	79
ITGAL	0.605297	3.4401e-09	9.26412e-07	78	79
MSN	0.605222	3.45936e-09	9.26412e-07	78	79
CD37	0.605079	3.4968e-09	9.26412e-07	78	79
STARD5	0.604713	3.59415e-09	9.39337e-07	78	79
SAMSN1	0.604445	3.66709e-09	9.4562e-07	78	79
IRF5	0.601628	4.52375e-09	1.15118e-06	78	79
ITGB2	0.600056	5.08127e-09	1.27626e-06	78	79
